# Supplementary material for: Elucidating the exceptional halide ion etching of bimetallic Ag–Cu oxides for efficient adsorption and porous nanostructure formation
Source: Royal Society of Chemistry journal article supplement (doi:10.1039/d3mh00231d), 2023-01-01
Supplement: d3mh00231d1.pdf [file d3mh00231d1.pdf]

# Supporting Information

## **Elucidating the exceptional halide ion etching of bimetallic Ag-Cu oxides for efficient adsorption and porous nanostructural formation**

Meng Zhang,<sup>a</sup> Fuzhu Liu,<sup>b</sup> Hongliang Yang,<sup>c</sup> Zhanglian Xu,<sup>\*a</sup> Junjie Wang,<sup>c</sup> Yutong Gong<sup>\*c</sup>

*<sup>a</sup>School of Nuclear Science and Technology, Xi'an Jiaotong University, Xi'an, Shaanxi 710049, P. R. China.*

*<sup>b</sup>School of Materials Science and Engineering, Xi'an Jiaotong University, Xi'an, Shaanxi 710049, P. R. China.*

*<sup>c</sup>State Key Laboratory of Solidification Processing, School of Materials Science and Engineering, Northwestern Polytechnical University, Xi'an, Shaanxi, 710072, P. R. China*

*\*Corresponding authors. E-mail: xuzhanglian@xjtu.edu.cn (Z. X.);  
gongyutong@nwpu.edu.cn (Y. G.).*

**Adsorption data fitting :**

(1) Langmuir and Freundlich models were used to fit the adsorption isotherm data according to the following equations, respectively.

$$\frac{C_e}{q_e} = \frac{1}{q_m K_L} + \frac{1}{q_m} C_e \quad (1)$$

$$\ln q_e = \ln K_F + \frac{1}{n} \ln C_e \quad (2)$$

where  $q_e$  (mg/g) represented the uptake capacity at equilibrium,  $C_e$  (mg/L) was the equilibrium concentration of solution,  $q_m$  (mg/g) was the theoretical maximum uptake capacity of the adsorbent.  $K_L$  was the Langmuir constant;  $n$  and  $K_F$  were the Freundlich constants.

(2) The pseudo-first- and second-order models were used to fit the kinetic data to investigate the adsorption mechanism. and the corresponding formula can be seen below.

$$\lg(q_e - q_t) = \lg q_e - \frac{k_1}{2.303} t \quad (3)$$

$$\frac{t}{q_t} = \frac{1}{k_2 q_e^2} + \frac{t}{q_e} \quad (4)$$

where  $q_t$  and  $q_e$  (mmol/g) represented the adsorption capacity at  $t$  (min) and equilibrium time, respectively;  $k_1$  ( $\text{min}^{-1}$ ) and  $k_2$  ( $\text{g mg}^{-1} \text{min}^{-1}$ ) were rate constants of the pseudo-first-order and pseudo-second-order model respectively.

Figures

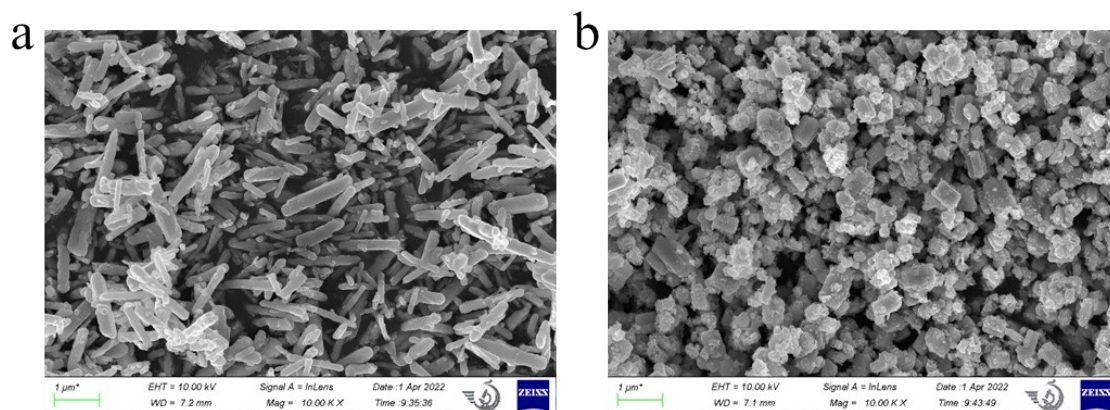

Figure S1. SEM images of (a)  $\text{Ag}_2\text{Cu}_2\text{O}_3$  and (b)  $\text{Ag}_2\text{Cu}_2\text{O}_4$ .

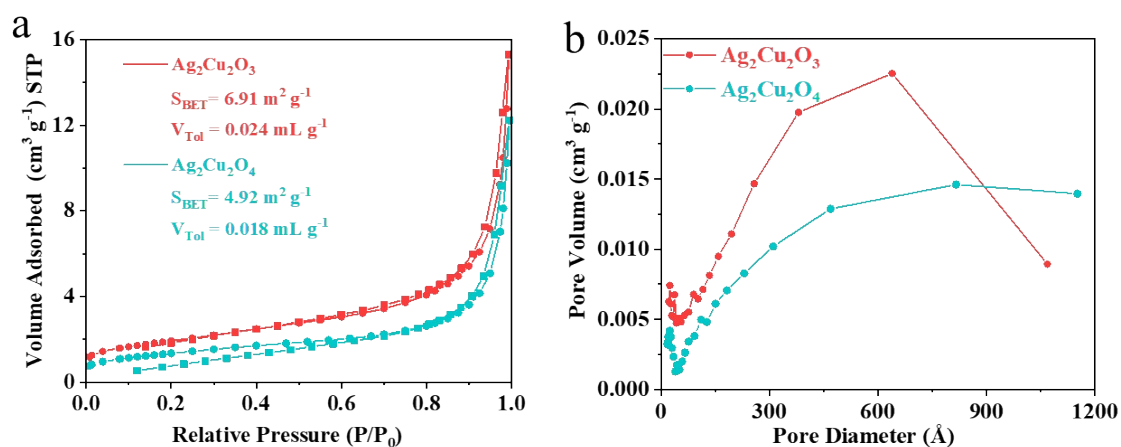

Figure S2. (a)  $\text{N}_2$  sorption isotherms and (b) pore size distributions of  $\text{Ag}_2\text{Cu}_2\text{O}_3$  and  $\text{Ag}_2\text{Cu}_2\text{O}_4$  samples.

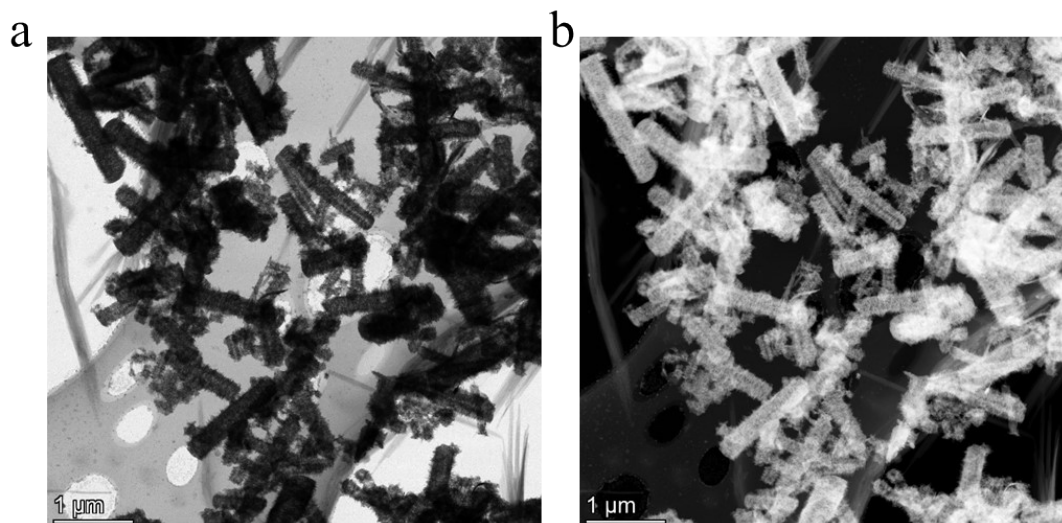

Figure S3. (a) TEM and (b) HAADF-STEM images of  $\text{Ag}_2\text{Cu}_2\text{O}_3$  etched by  $\text{I}^-$  for 24 h (the initial concentration of  $\text{I}^-$  was 7 mM).

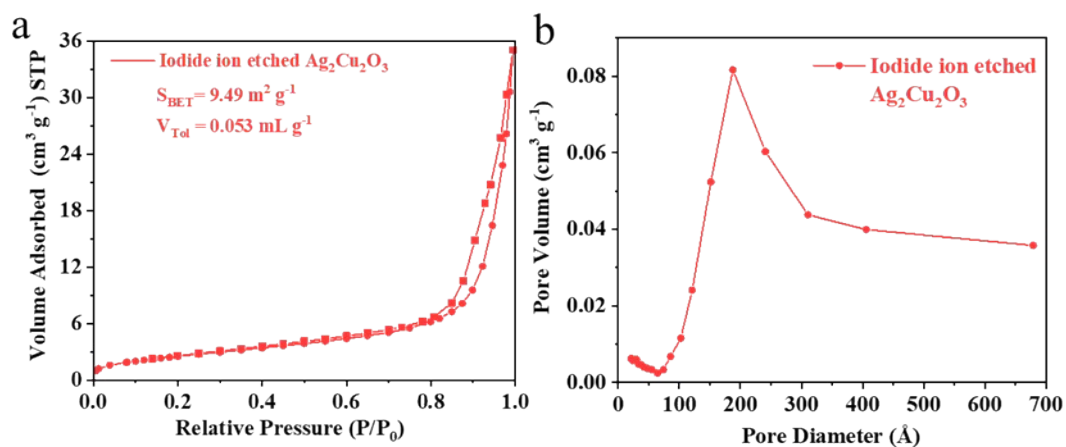

**Figure S4.** (a) N<sub>2</sub> sorption isotherms and (b) pore size distribution of Ag<sub>2</sub>Cu<sub>2</sub>O<sub>3</sub> samples after I<sup>-</sup> etching (the initial concentration of I<sup>-</sup> was 7 mM).

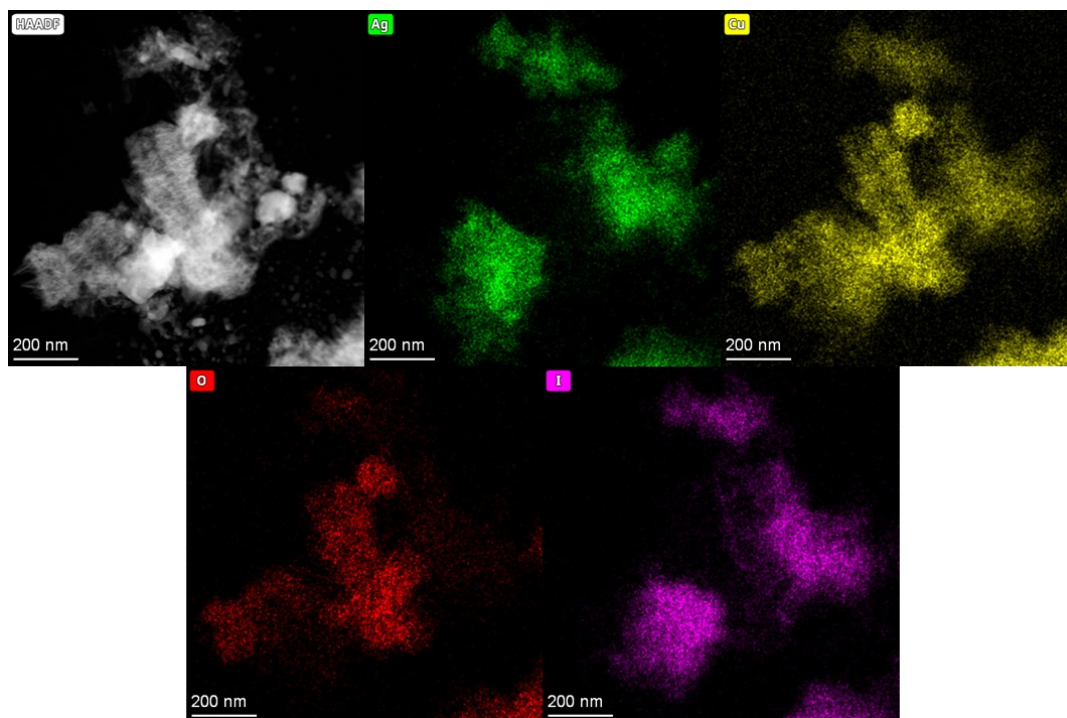

**Figure S5.** HAADF-STEM and corresponding elemental mapping images of Ag<sub>2</sub>Cu<sub>2</sub>O<sub>3</sub> etched by I<sup>-</sup> for 24 h (the initial concentration of I<sup>-</sup> was 7 mM).

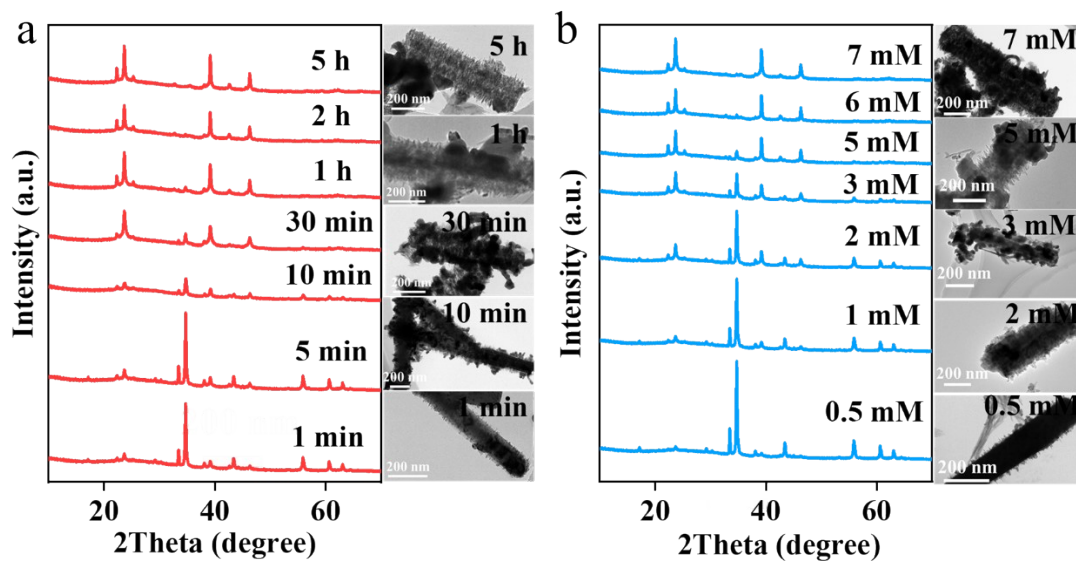

**Figure S6.** XRD patterns and the corresponding TEM images of  $\text{Ag}_2\text{Cu}_2\text{O}_3$  etched by  $\text{I}^-$  as a function of (a) etching time (the initial concentration of  $\text{I}^-$  was 7 mM) and (b) initial  $\text{I}^-$  concentration.

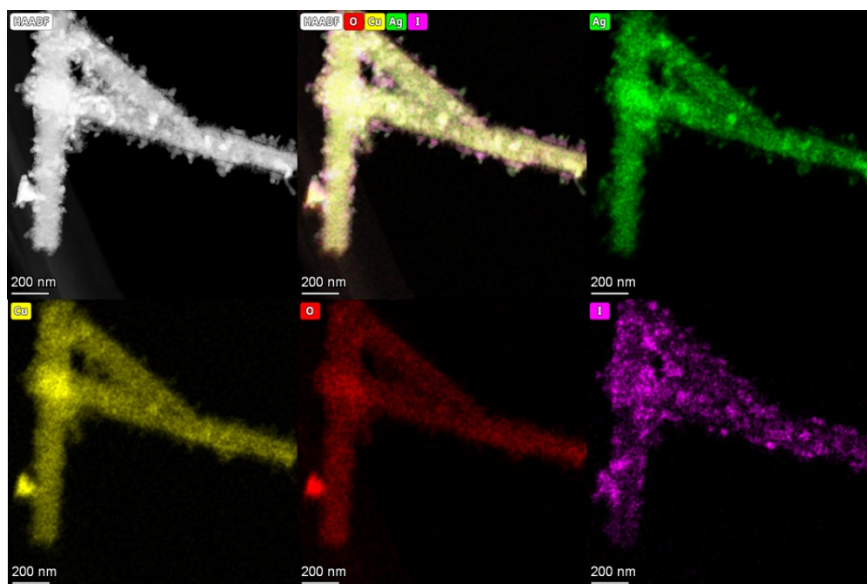

**Figure S7.** HAADF-STEM and corresponding elemental mapping images of  $\text{Ag}_2\text{Cu}_2\text{O}_3$  etched by  $\text{I}^-$  (the initial concentration of  $\text{I}^-$  was 7 mM) for 10 min.

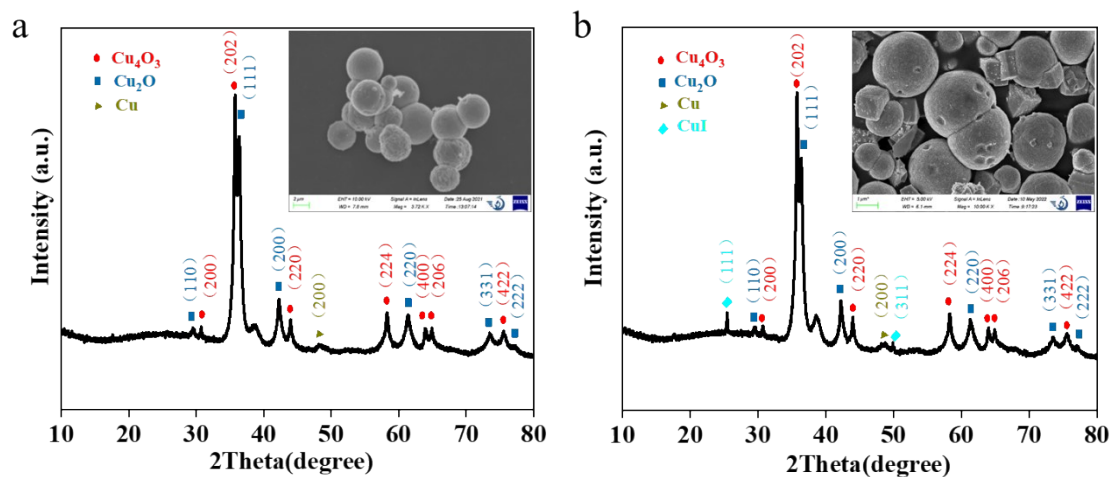

**Figure S8.** XRD patterns and SEM images (inset) of the synthesized  $\text{Cu}_4\text{O}_3$  (a) before and (b) after interaction with iodide ions.

Notes: The characteristic peaks and morphology of the  $\text{Cu}_4\text{O}_3$  phase were almost unchanged after contacting with iodide ions, and no  $\text{CuO}$  phase was observed, suggesting that  $\text{Cu}_4\text{O}_3$  did not undergo iodide etching. The appearance of the  $\text{CuI}$  phase in Figure S8b may be attributed to the reaction of other phases in the sample such as  $\text{Cu}_2\text{O}$  or  $\text{Cu}$  phase with iodide ions.

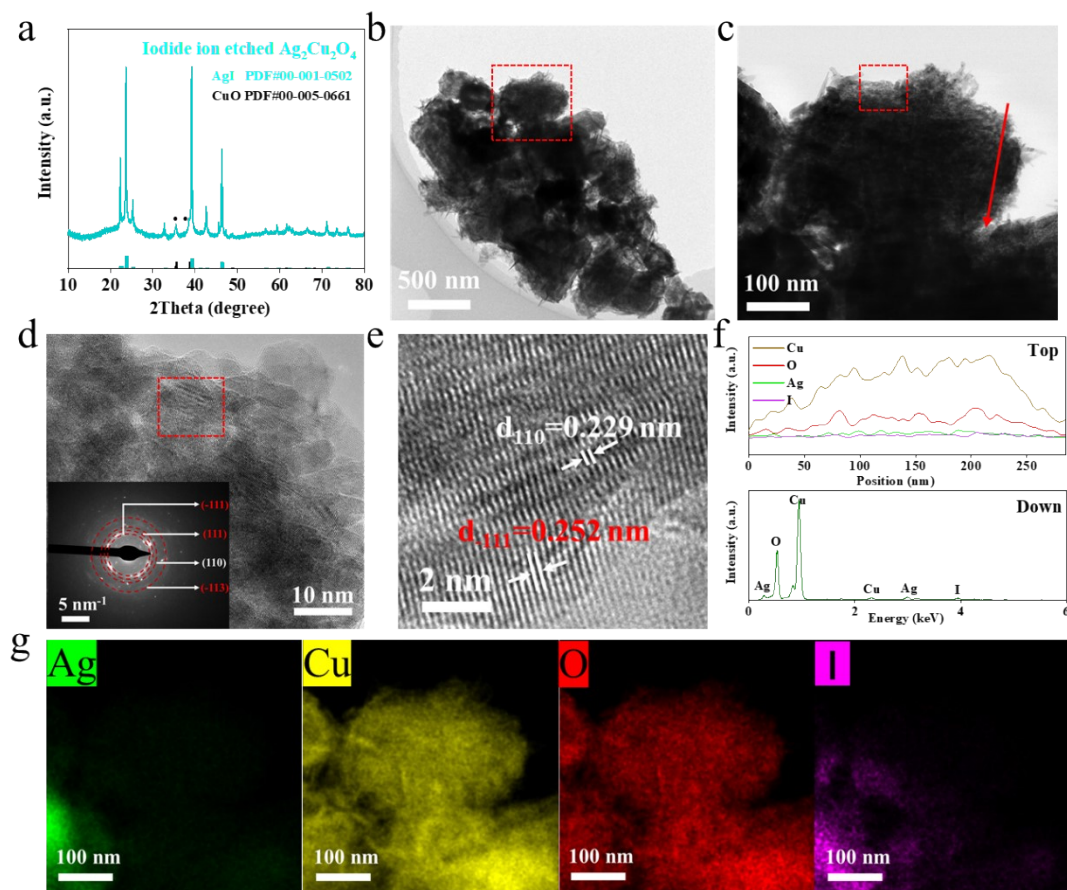

**Figure S9.** (a) PXRD pattern and (b-e) TEM images of  $\text{Ag}_2\text{Cu}_2\text{O}_4$  etched by iodide ions. The inset of Figure S8d is the selected area electron fraction (SAED) spectrum. (f) Representative STEM-EDX line profiles and (g) elemental mapping images of elements of  $\text{Ag}_2\text{Cu}_2\text{O}_4$  etched by iodide ions.

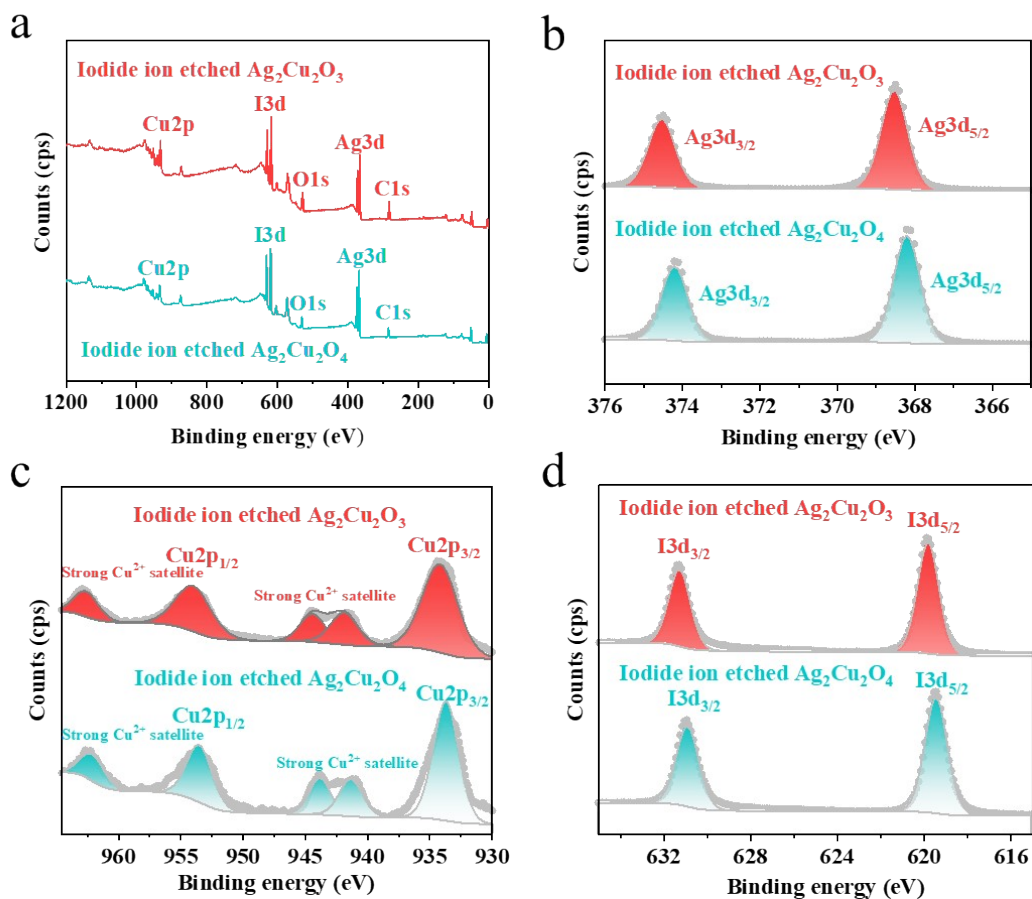

**Figure S10.** XPS spectra of  $\text{Ag}_2\text{Cu}_2\text{O}_3$  and  $\text{Ag}_2\text{Cu}_2\text{O}_4$  before and after uptake of  $\text{I}^-$ . (a) Survey scan; (b) Ag 3d and (c) Cu 2p spectra before and after  $\text{I}^-$  uptake; (d) I 3d spectra after  $\text{I}^-$  uptake.

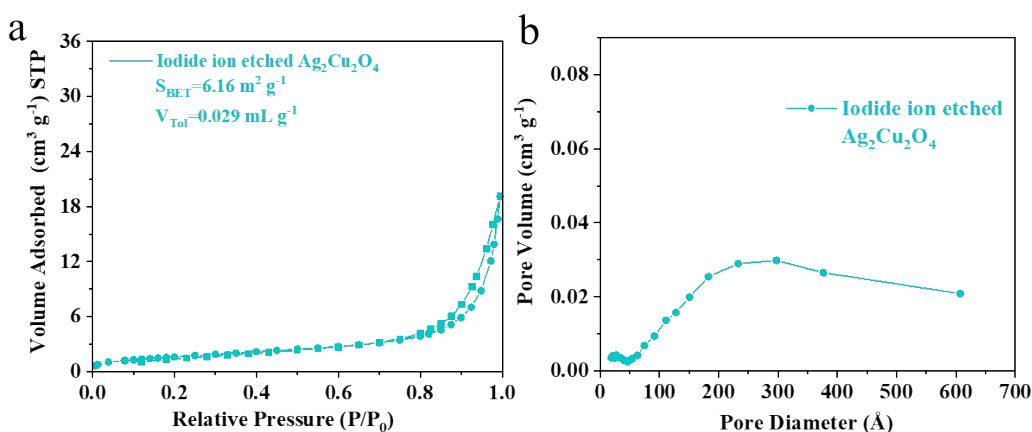

**Figure S11.** (a)  $\text{N}_2$  sorption isotherms and (b) pore size distribution of  $\text{Ag}_2\text{Cu}_2\text{O}_4$  samples after  $\text{I}^-$  etching (the initial concentration of  $\text{I}^-$  was 7 mM).



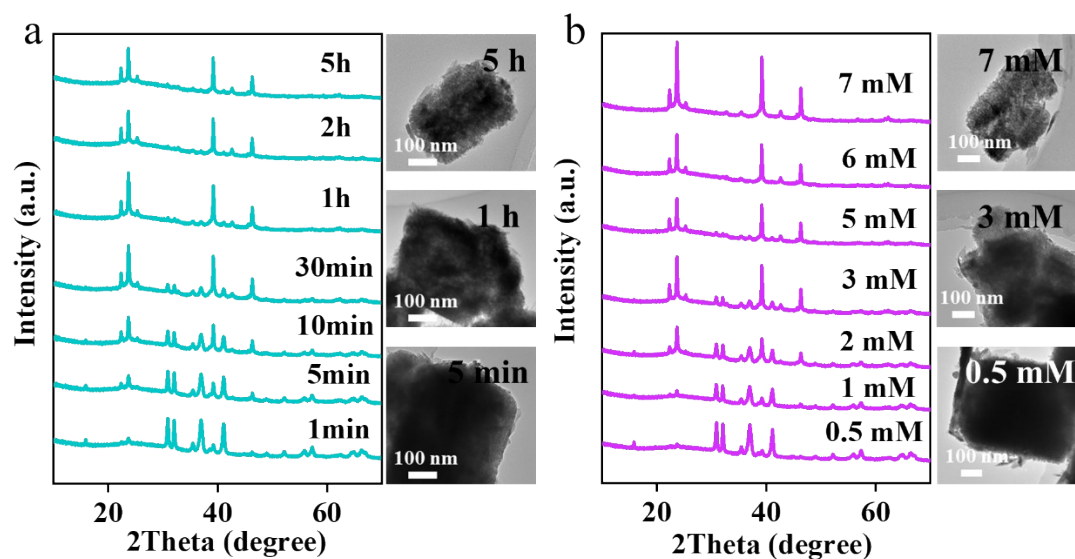

**Figure S12.** XRD patterns and the corresponding TEM images of  $\text{Ag}_2\text{Cu}_2\text{O}_4$  etched by  $\text{I}^-$  as a function of (a) etching time (the initial concentration of  $\text{I}^-$  was 7 mM) and (b) initial  $\text{I}^-$  concentration.

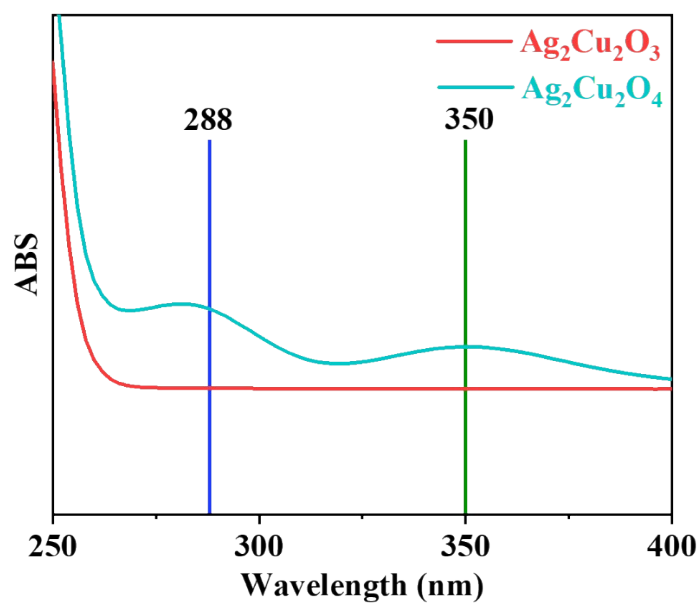

**Figure S13.** UV-Vis absorption spectra of the supernatants obtained after  $\text{I}^-$  etching of bimetallic Ag-Cu oxides for 10 min (the initial concentration of  $\text{I}^-$  was 7 mM).

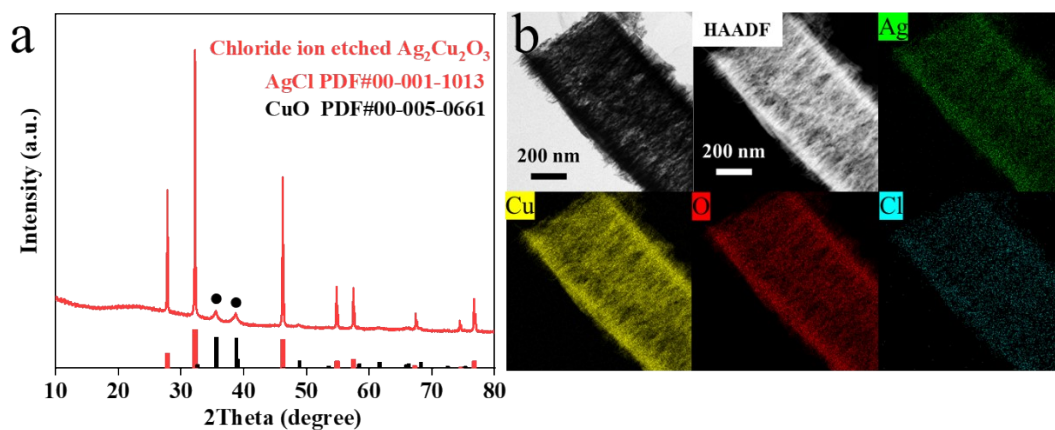

**Figure S14.** (a) PXRD pattern and (b) TEM images and elemental mapping images of the  $\text{Cl}^-$  etched  $\text{Ag}_2\text{Cu}_2\text{O}_3$  samples (the initial concentration of  $\text{Cl}^-$  was 7 mM).

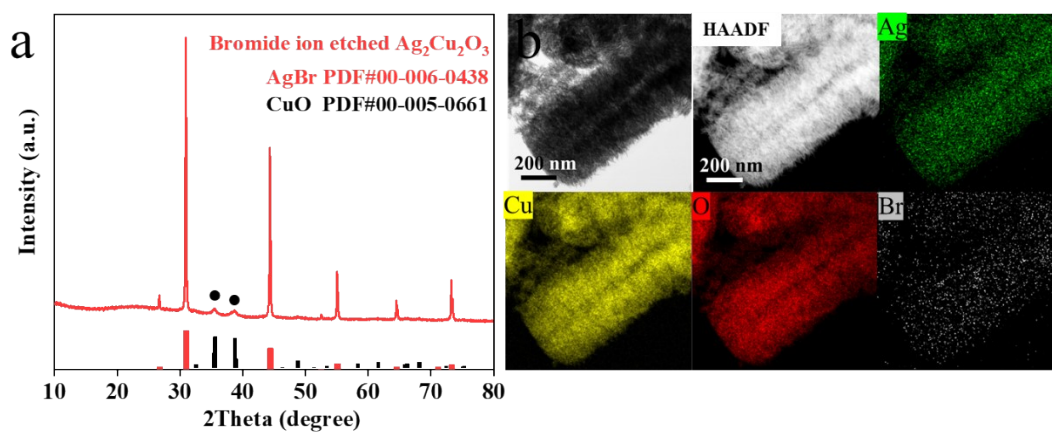

**Figure S15.** (a) PXRD pattern and (b) TEM images and elemental mapping images of the  $\text{Br}^-$  etched  $\text{Ag}_2\text{Cu}_2\text{O}_3$  samples (the initial concentration of  $\text{Br}^-$  was 7 mM).

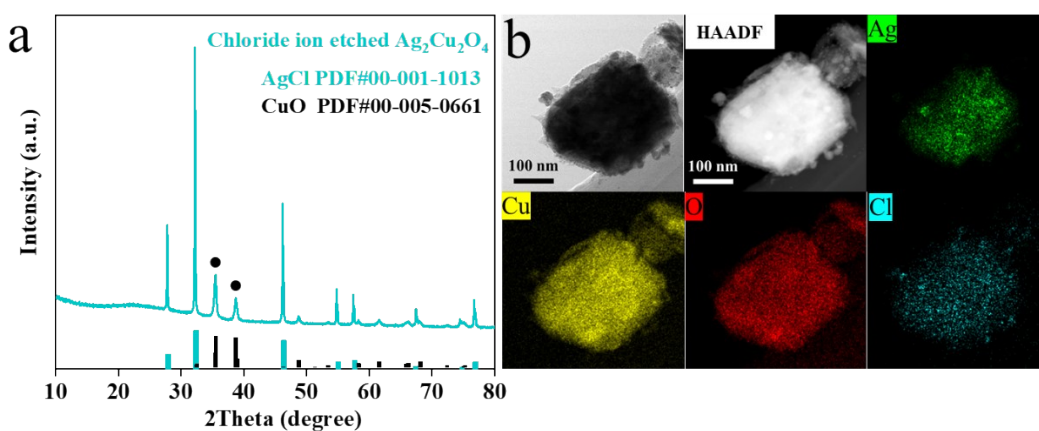

**Figure S16.** (a) PXRD pattern and (b) TEM images and elemental mapping images of the  $\text{Cl}^-$  etched  $\text{Ag}_2\text{Cu}_2\text{O}_4$  samples (the initial concentration of  $\text{Cl}^-$  was 7 mM).

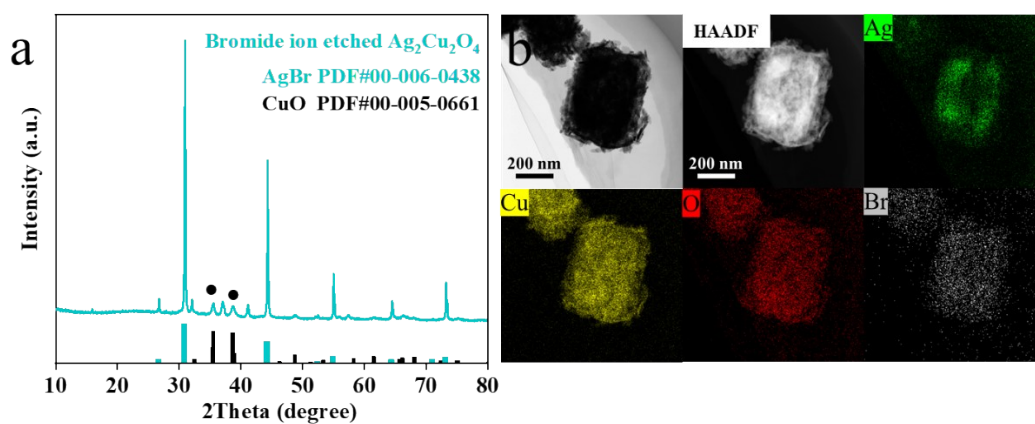

**Figure S17.** (a) PXRD pattern and (b) TEM images and elemental mapping images of the Br etched Ag<sub>2</sub>Cu<sub>2</sub>O<sub>4</sub> samples (the initial concentration of Br<sup>-</sup> was 7 mM).

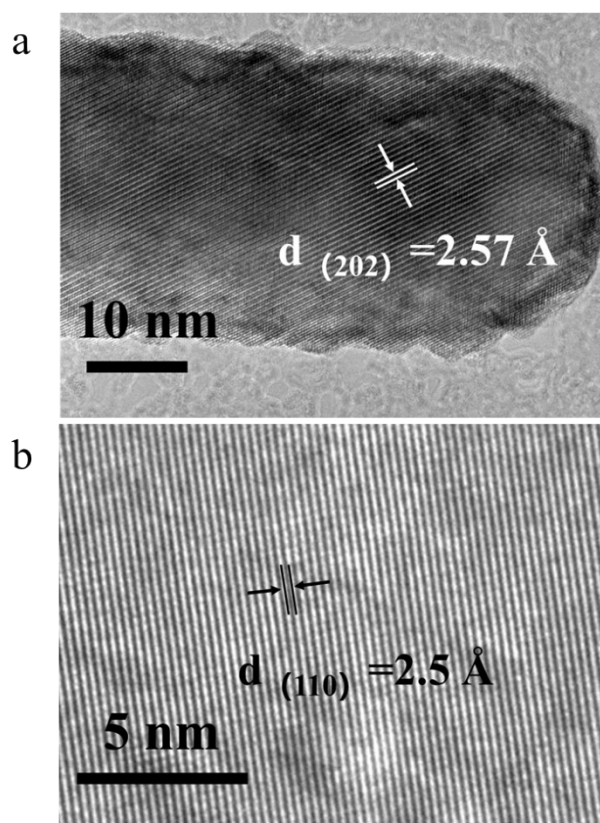

**Figure S18.** HRTEM images of (a) Ag<sub>2</sub>Cu<sub>2</sub>O<sub>3</sub> and (b) Ag<sub>2</sub>Cu<sub>2</sub>O<sub>4</sub>.

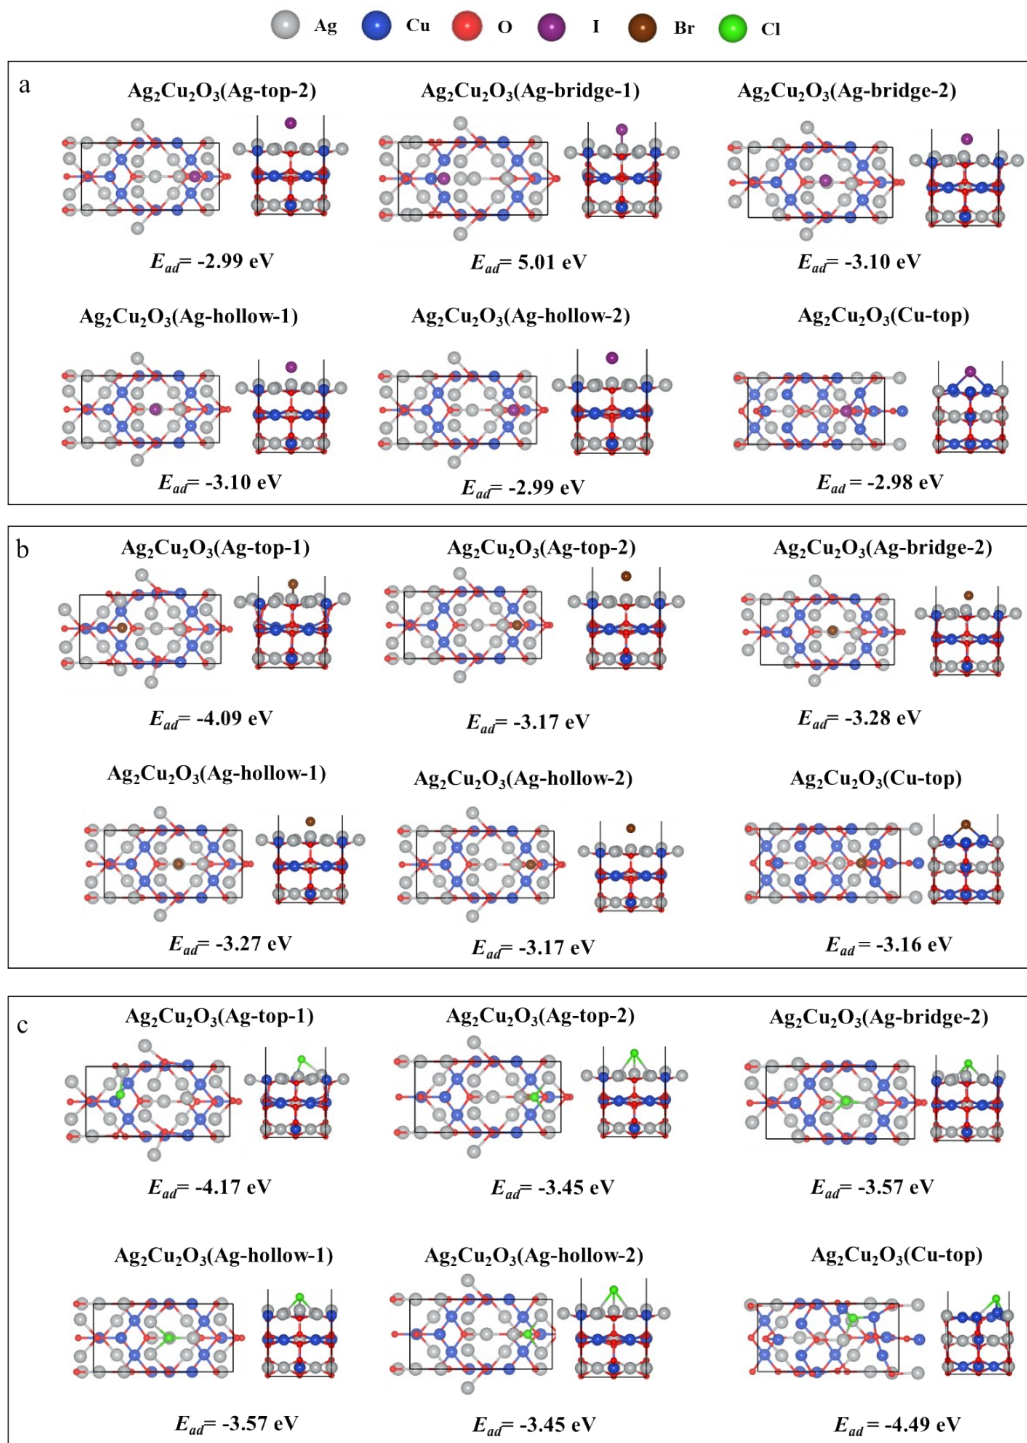

**Figure S19.** Adsorption configurations of I (a), Br (b), and Cl (c) on 202 surfaces of  $\text{Ag}_2\text{Cu}_2\text{O}_3$ .

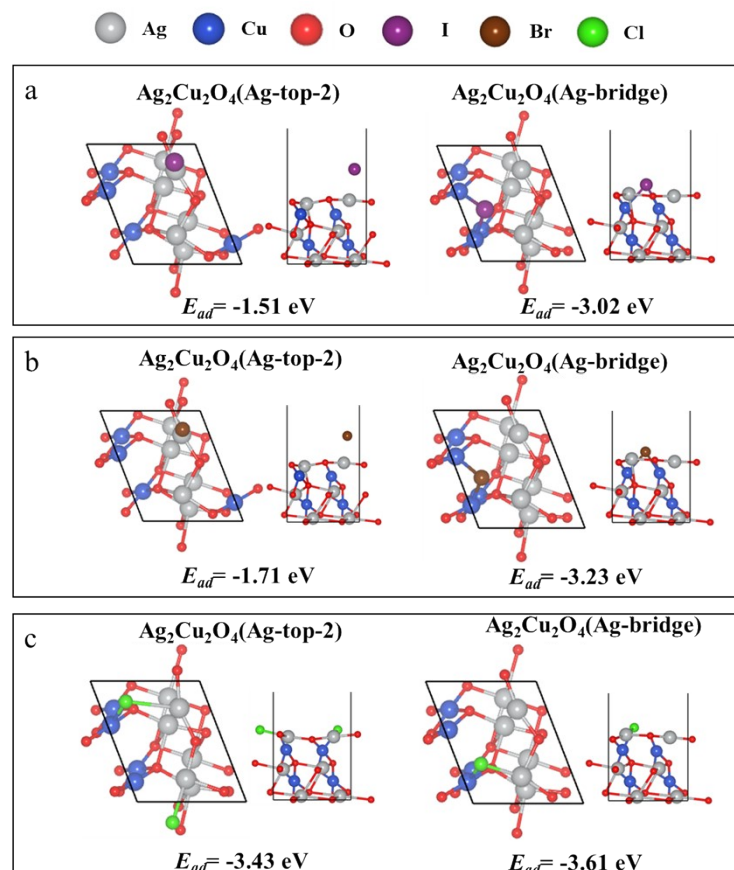

**Figure S20.** T Adsorption configurations of I (a), Br (b), and Cl (c) on 110 surfaces of  $\text{Ag}_2\text{Cu}_2\text{O}_4$ .

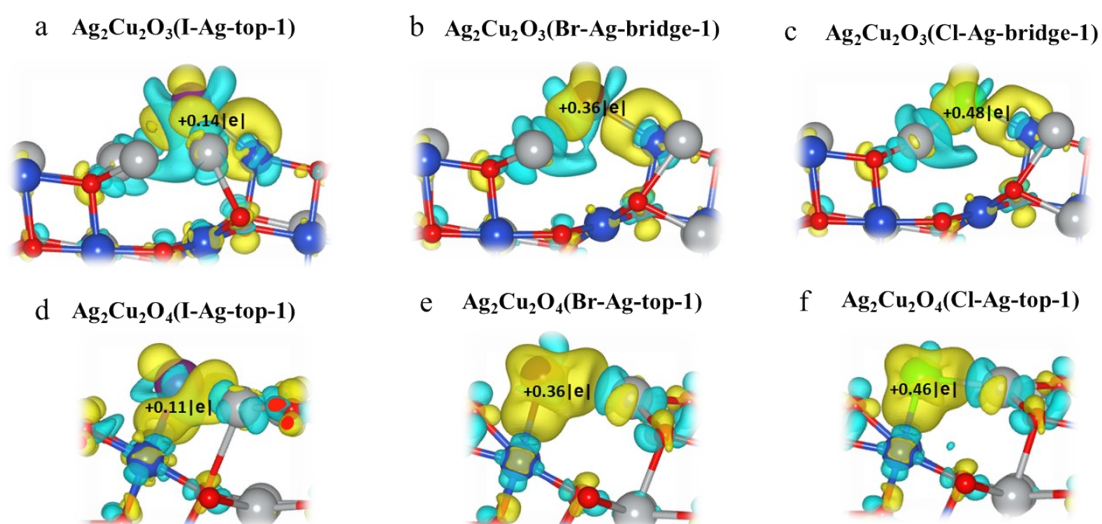

**Figure S21.** Differential charge density diagrams of  $\text{Ag}_2\text{Cu}_2\text{O}_3$  and  $\text{Ag}_2\text{Cu}_2\text{O}_4$  after adsorption of I (a, d), Br (b, e), and Cl (c, f).

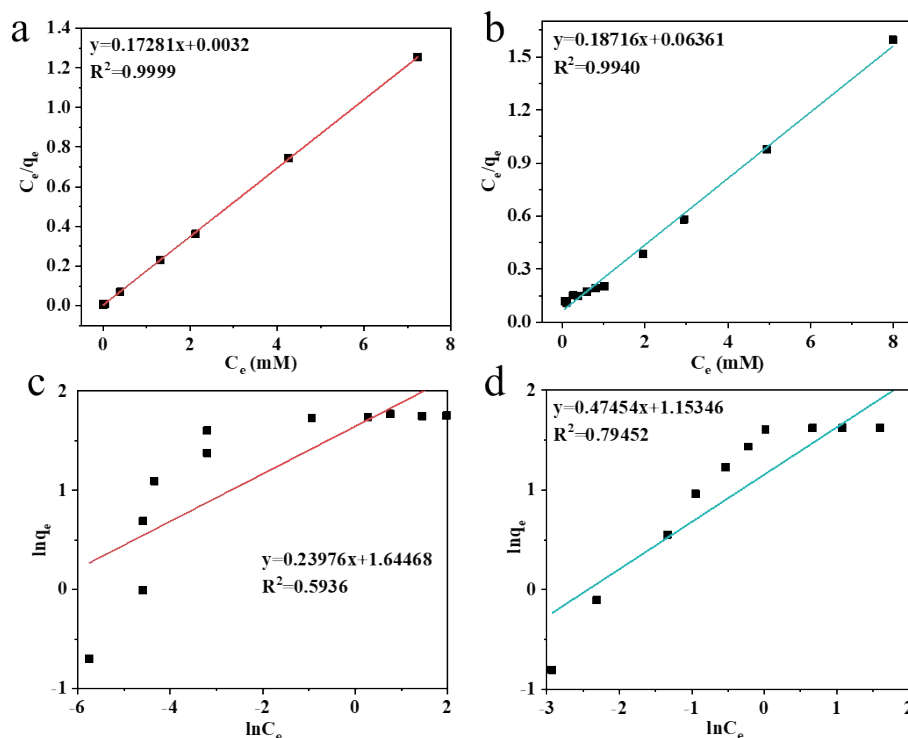

**Figure S22.** Langmuir models of (a)  $Ag_2Cu_2O_3$  and (b)  $Ag_2Cu_2O_4$  and Freundlich models of (c)  $Ag_2Cu_2O_3$  and (d)  $Ag_2Cu_2O_4$  for  $I^-$  adsorption.

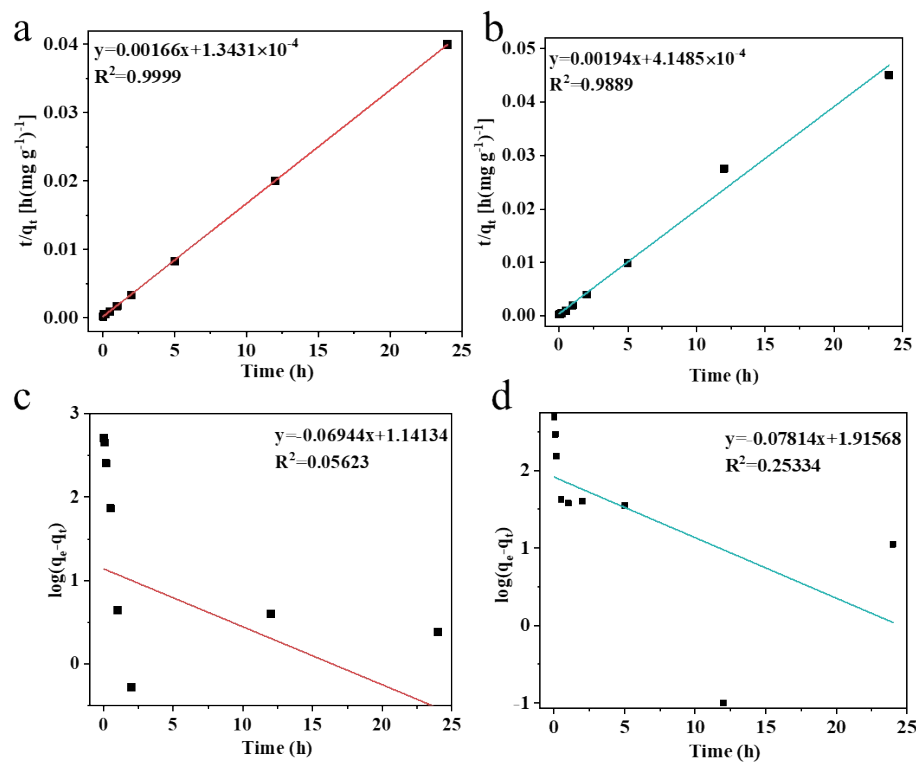

**Figure S23.** Pseudo-second-order kinetics models of (a)  $Ag_2Cu_2O_3$  and (b)  $Ag_2Cu_2O_4$  and pseudo-first-order kinetics models of (c)  $Ag_2Cu_2O_3$  and (d)  $Ag_2Cu_2O_4$  for  $I^-$  adsorption.

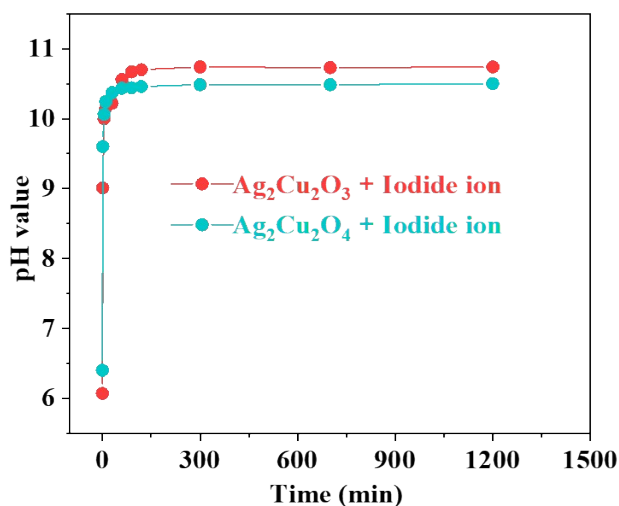

**Figure S24.** The pH change of I<sup>-</sup> solution depending on the contacting time with bimetallic Ag-Cu oxides (the initial concentration of I<sup>-</sup> was 7 mM).

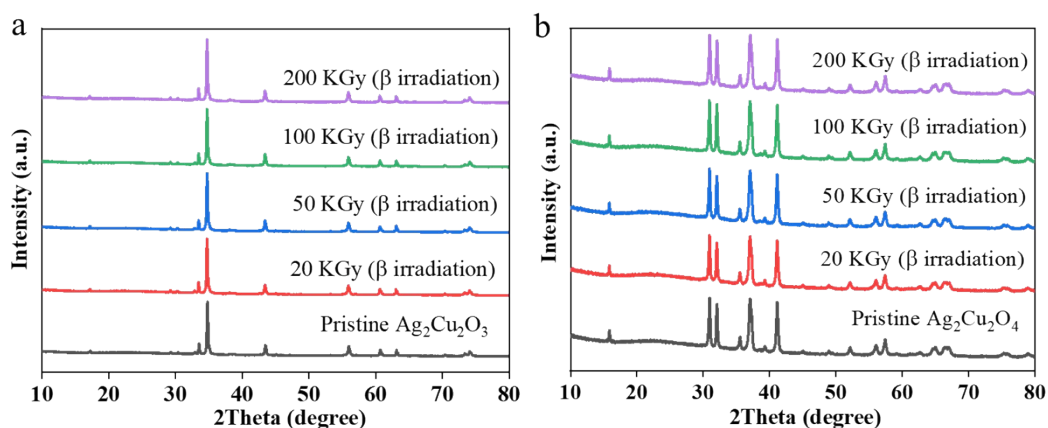

**Figure S25.** XRD patterns of pristine Ag<sub>2</sub>Cu<sub>2</sub>O<sub>3</sub> (a) and Ag<sub>2</sub>Cu<sub>2</sub>O<sub>4</sub> (b) and their corresponding samples after β irradiation.

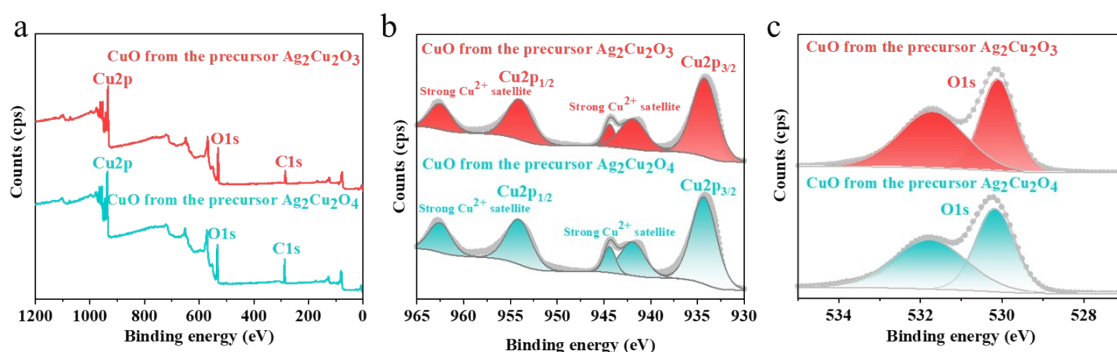

**Figure S26.** XPS spectra of porous CuO nanostructures after dissolving AgI crystals from the I<sup>-</sup> etched Ag<sub>2</sub>Cu<sub>2</sub>O<sub>3</sub> and Ag<sub>2</sub>Cu<sub>2</sub>O<sub>4</sub> (the initial concentration of I<sup>-</sup> was 7 mM): (a) Survey scan; High-resolution (b) Cu 2p and (c) O 1s spectra.

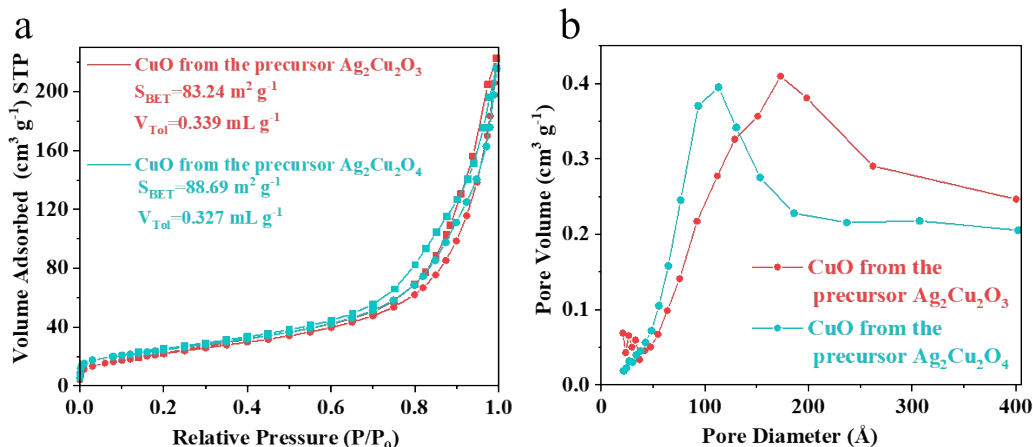

**Figure S27.** (a) N<sub>2</sub> sorption isotherms and (b) pore size distribution of porous CuO nanostructures after dissolving AgI crystals from the I<sup>-</sup> etched Ag<sub>2</sub>Cu<sub>2</sub>O<sub>3</sub> and Ag<sub>2</sub>Cu<sub>2</sub>O<sub>4</sub>.

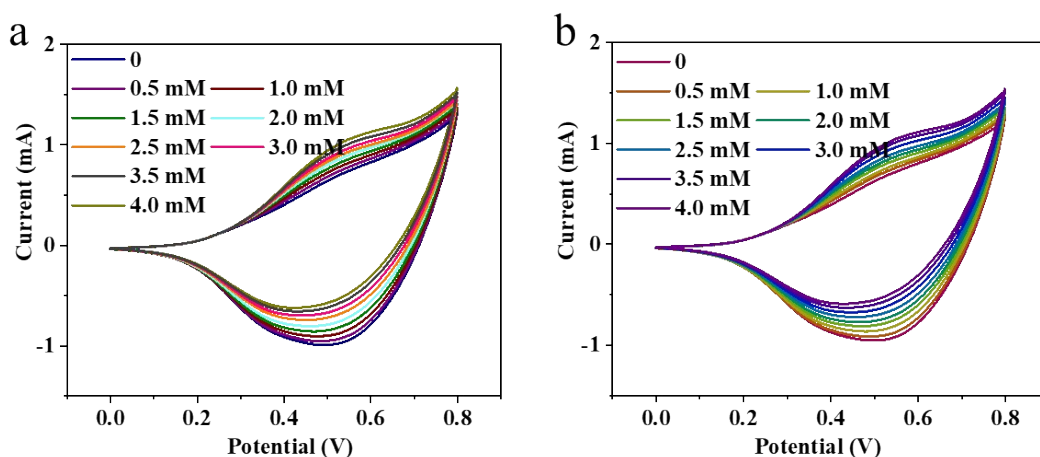

**Figure S28.** Cyclic voltammograms (CVs) of porous CuO electrodes obtained from (a) Ag<sub>2</sub>Cu<sub>2</sub>O<sub>3</sub> and (b) Ag<sub>2</sub>Cu<sub>2</sub>O<sub>4</sub> in 0.1 M NaOH containing 0-4.0 mM glucose at a scan rate of 100 mV s<sup>-1</sup>.

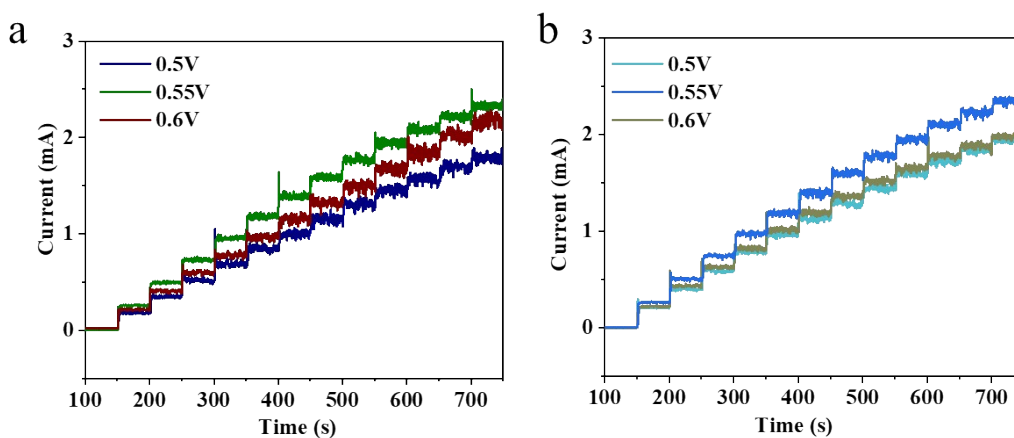

**Figure S29.** Amperometric i-t response of porous CuO electrodes obtained from (a) Ag<sub>2</sub>Cu<sub>2</sub>O<sub>3</sub> and (b) Ag<sub>2</sub>Cu<sub>2</sub>O<sub>4</sub> after the addition of 0.5 mM glucose at different applied potentials (vs. Ag/AgCl).



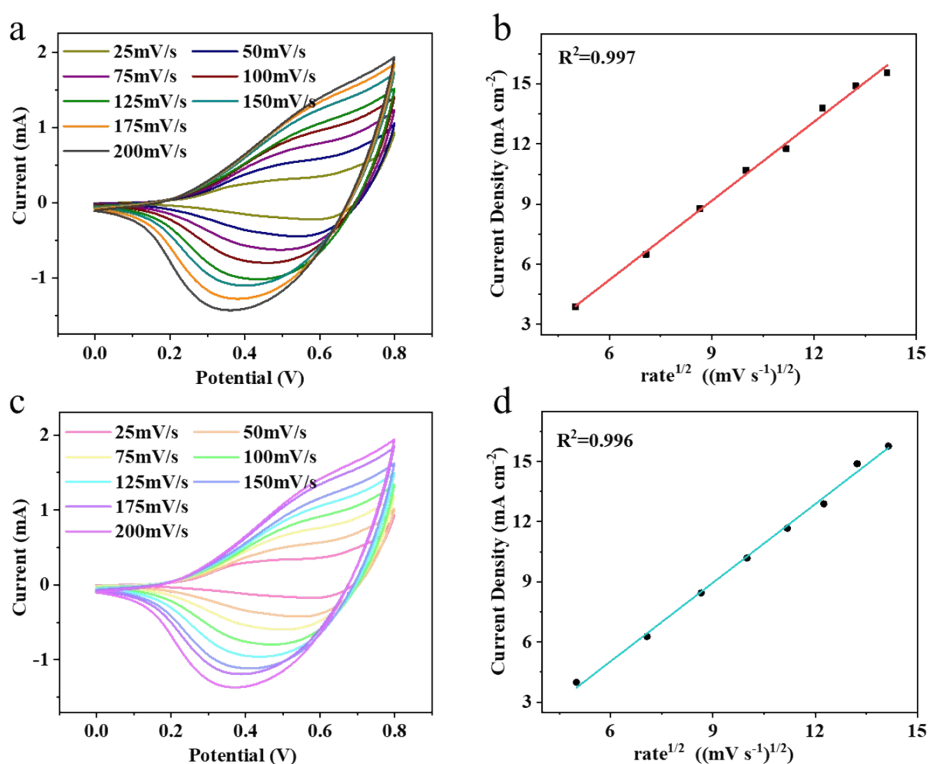

**Figure S30.** CVs of porous CuO nanomaterial electrodes obtained from the precursors of (a) Ag<sub>2</sub>Cu<sub>2</sub>O<sub>3</sub> and (c) Ag<sub>2</sub>Cu<sub>2</sub>O<sub>4</sub> in 0.1 M NaOH with 2.0 mM glucose at different scan rates. (b, d) Plots of the anodic peak current density versus the square root of the scan rate ( $v^{1/2}$ ) derived from (a, c).

Notes: To investigate the effect of the potential scan rate, the CV curves of both porous CuO electrodes were performed toward 2.0 mM glucose at different scan rates from 25 to 200 mV s<sup>-1</sup>, as shown in Fig. S23, and their corresponding plots of the peak current ( $I_{pa}$ ) versus the square root of scan rate presented a good linear relationship with the regression equation of  $I_{pa}$  ( $\mu\text{A}$ ) = 1.313  $v^{1/2}$  ((mV s<sup>-1</sup>)<sup>1/2</sup>) + 2.648 ( $R^2 = 0.997$ ) for porous CuO rods and  $I_{pa}$  ( $\mu\text{A}$ ) = 1.309  $v^{1/2}$  ((mV s<sup>-1</sup>)<sup>1/2</sup>) + 2.820 ( $R^2 = 0.996$ ) for porous CuO cubes, showing the diffusion-controlled process of glucose electrooxidation reaction on both porous CuO electrodes.

**Tables**

**Table S1.** Comparison of I<sup>-</sup> adsorbents for adsorption capacity, equilibrium adsorption time, and pH value.

| Adsorbents type                                                  | Adsorption     |                       | pH range | References |
|------------------------------------------------------------------|----------------|-----------------------|----------|------------|
|                                                                  | capacity(mg/g) | equilibrium time(min) |          |            |
| Ag <sub>2</sub> Cu <sub>2</sub> O <sub>3</sub>                   | 735            | 90                    | 3.5-11.5 | This work  |
| Ag <sub>2</sub> Cu <sub>2</sub> O <sub>4</sub>                   | 642            | 90                    | 3.5-11.5 | This work  |
| Ag <sub>2</sub> O-T3NT                                           | 571.1          | 10                    | 4-7      | 1          |
| Ag <sub>2</sub> O-T3NL                                           | 431.5          | 60                    | 7        | 2          |
| Ag <sub>2</sub> O-T3NF                                           | 381            | 60                    | 7        | 1          |
| Ag <sub>2</sub> O@Mg (OH) <sub>2</sub>                           | 380.7          | <10                   | 6        | 3          |
| Ag <sup>0</sup> /Ag <sub>2</sub> O                               | 326            | 1800                  | 6-7      | 4          |
| Ag <sub>2</sub> O-                                               |                |                       |          |            |
| Na <sub>2</sub> Nb <sub>2</sub> O <sub>6</sub> ·H <sub>2</sub> O | 291.9          | 100                   | 6-9      | 5          |
| 3D Ag <sub>2</sub> O-Ag/TiO <sub>2</sub>                         | 208            | 300                   | ---      | 6          |
| AgCl@CM                                                          | 193.7          | 20                    | 2_10     | 7          |
| AgAero                                                           | 88             | 420                   | 7-9.5    | 8          |
| MXene-PDA-                                                       |                |                       |          |            |
| Ag <sub>2</sub> O <sub>x</sub>                                   | 80             | 480                   | 5        | 9          |
| Bimetallic                                                       |                |                       |          |            |
| AgCu/Cu <sub>2</sub> O hybrid                                    | 66             | 240                   | 3        | 10         |
| 1.0%-Ag@Cu <sub>2</sub> O                                        | 25.4           | 90                    | 3-11     | 11         |
| 25%-Ag@MIL-                                                      |                |                       |          |            |
| 101                                                              | 2.14           | 180                   | 3-10     | 12         |

**Table S2.** Langmuir and Freundlich isotherm parameters for the adsorption of I<sup>-</sup>.

| Adsorbent                                      | Langmuir model        |                |                | Freundlich model |         |                |
|------------------------------------------------|-----------------------|----------------|----------------|------------------|---------|----------------|
|                                                | q <sub>m</sub> (mg/g) | K <sub>L</sub> | R <sup>2</sup> | K <sub>F</sub>   | 1/n     | R <sup>2</sup> |
| Ag <sub>2</sub> Cu <sub>2</sub> O <sub>3</sub> | 734.3                 | 0.4256         | 0.9999         | 5.1794           | 0.23976 | 0.5936         |
| Ag <sub>2</sub> Cu <sub>2</sub> O <sub>4</sub> | 678                   | 0.0232         | 0.994          | 3.1691           | 0.47454 | 0.79452        |

**Table S3.** Pseudo-first-order and Pseudo-second-order kinetics model constants of bimetallic Ag-Cu oxides for the adsorption of I<sup>-</sup>.

| Adsorbent                                      | Concentration (mM) | Pseudo-first-order model    |                |                | Pseudo-second-order model   |                |                |
|------------------------------------------------|--------------------|-----------------------------|----------------|----------------|-----------------------------|----------------|----------------|
|                                                |                    | R <sub>1</sub> <sup>2</sup> | q <sub>e</sub> | K <sub>1</sub> | R <sub>1</sub> <sup>2</sup> | q <sub>e</sub> | K <sub>2</sub> |
| Ag <sub>2</sub> Cu <sub>2</sub> O <sub>3</sub> | 5                  | 0.0562                      | 13.8465        | 0.0694         | 0.9999                      | 602.4096       | 0.0205         |
| Ag <sub>2</sub> Cu <sub>2</sub> O <sub>4</sub> | 5                  | 0.2533                      | 82.353         | 0.0781         | 0.9889                      | 515.4639       | 0.0091         |

**Table S4.** Comparison of glucose detection performances using various CuO-based electrodes.

| CuO nanostructures                                                     | Detection potential (V, vs. Ag/AgCl) | Linear range    | Sensitivity(μA cm <sup>-2</sup> mM <sup>-1</sup> ) | LOD(μM) | References |
|------------------------------------------------------------------------|--------------------------------------|-----------------|----------------------------------------------------|---------|------------|
| Porous CuO derived from Ag <sub>2</sub> Cu <sub>2</sub> O <sub>3</sub> | 0.55                                 | 0.01 μM-4.96 mM | 4615.26                                            | 0.4     | This work  |
| Porous CuO derived from Ag <sub>2</sub> Cu <sub>2</sub> O <sub>4</sub> | 0.55                                 | 0.01 μM-5.96 mM | 4241.63                                            | 0.48    | This work  |
| CuO nanowires                                                          | 0.33                                 | 0.4 μM-2.0 mM   | 490                                                | 0.049   | 13         |
| CuO nanospheres                                                        | 0.6                                  | up to 2.55 mM   | 404.53                                             | 1       | 14         |
| CuO/MWCNTs                                                             | 0.4                                  | 0.4 μM-         | 2596                                               | 0.2     | 15         |

|                           |       |                |         |       |    |
|---------------------------|-------|----------------|---------|-------|----|
|                           |       | 1.2 mM         |         |       |    |
| CuO nanoplatelets         | 0.55  | up to 0.80 mM  | 3490.7  | 0.5   | 16 |
| CuO-SWCNT                 | 0.495 | 0.05 μM-1.8 mM | 1610    | 0.05  | 17 |
| CuO nanoellipsoids        | 0.55  | 100 μM-3.0 mM  | 2555    | 0.072 | 18 |
| CuO nanowires             | 0.55  | ---            | 684.2   | 2     | 19 |
| Hollow CuO polyhedrons    | 0.55  | up to 4.0 mM   | 1112    | 0.33  | 20 |
| 3D porous CuO nanowires   | 0.35  | up to 2.55 mM  | 1420.3  | 5.1   | 21 |
| CuO nanoparticles/ITO     | 0.59  | up to 4.4 mM   | 450.2   | 0.7   | 22 |
| CuO nanorods              | 0.55  | 100 μM-4.0 mM  | 1834    | 0.22  | 23 |
| Porous CuO nanobelts      | 0.5   | 0.1 μM-2.0 mM  | 1876.52 | 0.06  | 24 |
| CuBr@CuO nanoparticles    | 0.345 | 5.0 μM-3.51 mM | 3096    | 1.44  | 25 |
| CuO nanorod@PCFs          | 0.6   | 5.0 μM-0.8 mM  | 608.9   | 5     | 26 |
| CuO nanoparticles-CSs/GCE | 0.55  | 0.5 μM-2.3 mM  | 2981    | 0.5   | 27 |
| CuO@C/D                   | 0.5   | 0.5 μM-4 mM    | 1650    | 0.5   | 28 |

**Table S5.** Amperometric response of the porous CuO nanostructure electrodes toward 0.1 mM interferents at 0.55 V (vs. SCE) in the absence and presence of 1.0 mM glucose in 0.1 M NaOH.

| Interferents | CuO electrodes from Ag <sub>2</sub> Cu <sub>2</sub> O <sub>3</sub> |       | CuO electrodes from Ag <sub>2</sub> Cu <sub>2</sub> O <sub>4</sub> |       |
|--------------|--------------------------------------------------------------------|-------|--------------------------------------------------------------------|-------|
|              | Response(mA)                                                       | ratio | Response(mA)                                                       | ratio |
| Glucose      | 0.434493                                                           |       | 0.379117                                                           |       |
| Lactose      | 0.47                                                               | 8.17% | 0.416808                                                           | 9.94% |
| Galactose    | 0.505                                                              | 7.45% | 0.448727                                                           | 7.66% |
| Sucrose      | 0.544                                                              | 7.75% | 0.48438                                                            | 7.94% |
| Fructose     | 0.572                                                              | 5.12% | 0.508829                                                           | 5.05% |
| NaCl         | 0.58                                                               | 1.38% | 0.512564                                                           | 0.73% |
| Uric acid    | 0.576                                                              | 0.69% | 0.510526                                                           | 0.41% |

**Table S6.** Main composition of the synthetic seawater used in this work (pH 8.15).

| Composition                   | Concentration (g/L) |
|-------------------------------|---------------------|
| Na <sup>+</sup>               | 10.833              |
| K <sup>+</sup>                | 0.369               |
| Ca <sup>2+</sup>              | 0.544               |
| Mg <sup>2+</sup>              | 2.736               |
| SO <sub>4</sub> <sup>2-</sup> | 2.707               |
| HCO <sub>3</sub> <sup>-</sup> | 0.145               |
| Cl <sup>-</sup>               | 23.928              |

## References

- (1) Yang, D.; Sarina, S.; Zhu, H.; Liu, H.; Zheng, Z.; Xie, M.; Smith, S. V.; Komarneni, S. Capture of Radioactive Cesium and Iodide Ions from Water by Using Titanate Nanofibers and Nanotubes. *Angew. Chemie - Int. Ed.* **2011**, *50* (45), 10594–10598.
- (2) Bo, A.; Sarina, S.; Zheng, Z.; Yang, D.; Liu, H.; Zhu, H. Removal of Radioactive Iodine from Water Using Ag<sub>2</sub>O Grafted Titanate Nanolamina as Efficient Adsorbent. *J. Hazard. Mater.* **2013**, *246–247*, 199–205.
- (3) Chen, Y. Y.; Yu, S. H.; Yao, Q. Z.; Fu, S. Q.; Zhou, G. T. One-Step Synthesis of Ag<sub>2</sub>O@Mg(OH)<sub>2</sub> Nanocomposite as an Efficient Scavenger for Iodine and Uranium. *J.*

*Colloid Interface Sci.* **2018**, *510*, 280–291.

- (4) Baimenov, A. Z.; Berillo, D. A.; Inglezakis, V. J. Cryogel-Based Ag<sup>0</sup>/Ag<sub>2</sub>O Nanocomposites for Iodide Removal from Water. *J. Mol. Liq.* **2020**, *299*, 112134.
- (5) Mu, W.; Li, X.; Liu, G.; Yu, Q.; Xie, X.; Wei, H.; Jian, Y. Safe Disposal of Radioactive Iodide Ions from Solutions by Ag<sub>2</sub>O Grafted Sodium Niobate Nanofibers. *Dalt. Trans.* **2016**, *45* (2), 753–759.
- (6) Liu, S.; Wang, N.; Zhang, Y.; Li, Y.; Han, Z.; Na, P. Efficient Removal of Radioactive Iodide Ions from Water by Three-Dimensional Ag<sub>2</sub>O-Ag/TiO<sub>2</sub> Composites under Visible Light Irradiation. *J. Hazard. Mater.* **2014**, *284*, 171–181.
- (7) Li, Q.; Mao, Q.; Li, M.; Zhang, S.; He, G.; Zhang, W. Cross-Linked Chitosan Microspheres Entrapping Silver Chloride via the Improved Emulsion Technology for Iodide Ion Adsorption. *Carbohydr. Polym.* **2020**, *234*, 115926.
- (8) Asmussen, R. M.; Matyáš, J.; Qafoku, N. P.; Kruger, A. A. Silver-Functionalized Silica Aerogels and Their Application in the Removal of Iodine from Aqueous Environments. *J. Hazard. Mater.* **2019**, *379*, 119364.
- (9) Huang, H.; Sha, X.; Cui, Y.; Sun, S.; Huang, H.; He, Z.; Liu, M.; Zhou, N.; Zhang, X.; Wei, Y. Highly Efficient Removal of Iodine Ions Using MXene-PDA-Ag<sub>2</sub>O<sub>x</sub> Composites Synthesized by Mussel-Inspired Chemistry. *J. Colloid Interface Sci.* **2020**, *567*, 190–201.
- (10) Mao, P.; Liu, Y.; Liu, X.; Wang, Y.; Liang, J.; Zhou, Q.; Dai, Y.; Jiao, Y.; Chen, S.; Yang, Y. Bimetallic AgCu/Cu<sub>2</sub>O Hybrid for the Synergetic Adsorption of Iodide from Solution. *Chemosphere* **2017**, *180*, 317–325.
- (11) Mao, P.; Liu, Y.; Jiao, Y.; Chen, S.; Yang, Y. Enhanced Uptake of Iodide on Ag@Cu<sub>2</sub>O Nanoparticles. *Chemosphere* **2016**, *164*, 396–403.
- (12) Mao, P.; Qi, B.; Liu, Y.; Zhao, L.; Jiao, Y.; Zhang, Y.; Jiang, Z.; Li, Q.; Wang, J.; Chen, S.; Yang, Y. AgII Doped MIL-101 and Its Adsorption of Iodine with High Speed in Solution. *J. Solid State Chem.* **2016**, *237*, 274–283.
- (13) Zhuang, Z.; Su, X.; Yuan, H.; Sun, Q.; Xiao, D.; Choi, M. M. F. An Improved Sensitivity Non-Enzymatic Glucose Sensor Based on a CuO Nanowire Modified Cu Electrode. *Analyst* **2008**, *133* (1), 126–132.
- (14) Reitz, E.; Jia, W.; Gentile, M.; Wang, Y.; Lei, Y. CuO Nanospheres Based Nonenzymatic Glucose Sensor. *Electroanalysis* **2008**, *20* (22), 2482–2486.
- (15) Jiang, L. C.; Zhang, W. De. A Highly Sensitive Nonenzymatic Glucose Sensor Based on CuO Nanoparticles-Modified Carbon Nanotube Electrode. *Biosens. Bioelectron.* **2010**,

- 25 (6), 1402–1407.
- (16) Wang, J.; Zhang, W. De. Fabrication of CuO Nanoplatelets for Highly Sensitive Enzyme-Free Determination of Glucose. *Electrochim. Acta* **2011**, *56* (22), 7510–7516.
- (17) Quoc Dung, N.; Patil, D.; Jung, H.; Kim, D. A High-Performance Nonenzymatic Glucose Sensor Made of CuO-SWCNT Nanocomposites. *Biosens. Bioelectron.* **2013**, *42* (1), 280–286.
- (18) Zhang, X.; Sun, S.; Lv, J.; Tang, L.; Kong, C.; Song, X.; Yang, Z. Nanoparticle-Aggregated CuO Nanoellipsoids for High-Performance Non-Enzymatic Glucose Detection. *J. Mater. Chem. A* **2014**, *2* (26), 10073–10080.
- (19) Zhang, Y.; Liu, Y.; Su, L.; Zhang, Z.; Huo, D.; Hou, C.; Lei, Y. CuO Nanowires Based Sensitive and Selective Non-Enzymatic Glucose Detection. *Sensors Actuators, B Chem.* **2014**, *191*, 86–93.
- (20) Kong, C.; Tang, L.; Zhang, X.; Sun, S.; Yang, S.; Song, X.; Yang, Z. Templating Synthesis of Hollow CuO Polyhedron and Its Application for Nonenzymatic Glucose Detection. *J. Mater. Chem. A* **2014**, *2* (20), 7306–7312.
- (21) Huang, J.; Zhu, Y.; Yang, X.; Chen, W.; Zhou, Y.; Li, C. Flexible 3D Porous CuO Nanowire Arrays for Enzymeless Glucose Sensing: In Situ Engineered versus Ex Situ Piled. *Nanoscale* **2015**, *7* (2), 559–569.
- (22) Wang, T.; Su, W.; Fu, Y.; Hu, J. Controllably Annealed CuO-Nanoparticle Modified ITO Electrodes: Characterisation and Electrochemical Studies. *Appl. Surf. Sci.* **2016**, *390*, 795–803.
- (23) Gou, X.; Sun, S.; Yang, Q.; Li, P.; Liang, S.; Zhang, X.; Yang, Z. A Very Facile Strategy for the Synthesis of Ultrathin CuO Nanorods towards Non-Enzymatic Glucose Sensing. *New J. Chem.* **2018**, *42* (8), 6364–6369.
- (24) Li, Y. Y.; Kang, P.; Wang, S. Q.; Liu, Z. G.; Li, Y. X.; Guo, Z. Ag Nanoparticles Anchored onto Porous CuO Nanobelts for the Ultrasensitive Electrochemical Detection of Dopamine in Human Serum. *Sensors Actuators, B Chem.* **2021**, *327*, 128878.
- (25) Lin, W. J.; Lin, Y. S.; Chang, H. T.; Unnikrishnan, B.; Huang, C. C. Electrocatalytic CuBr@CuO Nanoparticles Based Salivary Glucose Probes. *Biosens. Bioelectron.* **2021**, *194*, 113610.
- (26) Li, M.; Zhao, Z.; Liu, X.; Xiong, Y.; Han, C.; Zhang, Y.; Bo, X.; Guo, L. Novel Bamboo Leaf Shaped CuO Nanorod@hollow Carbon Fibers Derived from Plant Biomass for Efficient and Nonenzymatic Glucose Detection. *Analyst* **2015**, *140* (18), 6412–6420.
- (27) Zhang, J.; Ma, J.; Zhang, S.; Wang, W.; Chen, Z. A Highly Sensitive Nonenzymatic

Glucose Sensor Based on CuO Nanoparticles Decorated Carbon Spheres. *Sensors Actuators, B Chem.* **2015**, *211*, 385–391.

- (28) Zhai, Z.; Leng, B.; Yang, N.; Yang, B.; Liu, L.; Huang, N.; Jiang, X. Rational Construction of 3D-Networked Carbon Nanowalls/Diamond Supporting CuO Architecture for High-Performance Electrochemical Biosensors. *Small* **2019**, *15* (48),1901527.
